# Supplementary material for: Geographical Distribution and Multimethod Species Identification of Forensically Important Necrophagous Flies on Hainan Island
Source: MDPI journal article supplement (doi:10.3390/insects14110898), 2023-11-20
Supplement: s1 [file s1]

## Supplementary Data File

**Table S1** Species composition of necrophagous flies in Hainan Island

**Table S2** Interspecific genetic divergence among 30 species based on analyses of COI.

**Table S1** Species composition of necrophagous flies in Hainan Island

| Family                | Subgenus               | Species                                              | Quantity of collected samples                  |      |
|-----------------------|------------------------|------------------------------------------------------|------------------------------------------------|------|
| Sarcophagidae (4,847) | Parasarcophaga (2,585) | <i>Sarcophaga dux</i> Thomson, 1869                  | 562                                            |      |
|                       |                        | <i>Sarcophaga misera</i> Walker, 1849                | 1008                                           |      |
|                       |                        | <i>Sarcophaga sericea</i> (Robineau-Desvoidy, 1830)  | 700                                            |      |
|                       |                        | <i>Sarcophaga scopariiformis</i> Senior-White, 1927  | 5                                              |      |
|                       |                        | <i>Sarcophaga albiceps</i> Meigen, 1826              | 77                                             |      |
|                       |                        | <i>Sarcophaga ruficornis</i> (Fabricius, 1794)       | 52                                             |      |
|                       |                        | <i>Sarcophaga brevicornis</i> (Ho, 1934)             | 38                                             |      |
|                       |                        | <i>Sarcophaga similis</i> Meade, 1876                | 81                                             |      |
|                       |                        | <i>Sarcophaga semenovi</i> Rohdendorf, 1925          | 62                                             |      |
|                       |                        | <i>Sarcophaga peregrina</i> (Robineau-Desvoidy 1830) | 1346                                           |      |
|                       | Boettcherisca (1,392)  | <i>Sarcophaga formosensis</i> (KirneretLopes,1961)   | 46                                             |      |
|                       | Lioproctia (11)        | <i>Sarcophaga pattoni</i> Senior-White, 1924         | 11                                             |      |
|                       | Seniorwhitea (166)     | <i>Sarcophaga reciproca</i> Walker, 1856             | 166                                            |      |
|                       | Pierretia (15)         | <i>Sarcophaga caudagalli</i> Bottcher, 1912          | 4                                              |      |
|                       |                        | <i>Sarcophaga josephi</i> Bottcher, 1912             | 11                                             |      |
|                       | Leucomyia 630          | <i>Sarcophaga cinerea</i> (Fabricius, 1794)          | 630                                            |      |
|                       | Bercaea (48)           | <i>Sarcophaga cruentata</i> Meigen, 1826             | 48                                             |      |
|                       | Calliphoridae (6,570)  | Chrysomya (3,936)                                    | <i>Chrysomya pinguis</i> (Walker,1858)         | 536  |
|                       |                        |                                                      | <i>Chrysomya megacephala</i> (Fabricius, 1794) | 3400 |
| Achoetandrus (1,331)  |                        | <i>Chrysomya rufifacies</i> (Macquart, 1843)         | 1131                                           |      |
|                       |                        | <i>Chrysomya villeneuvei</i> Patton, 1922            | 200                                            |      |
| Hemipyrellia (980)    |                        | <i>Hemipyrellia ligurriens</i> (Wiedemann,1830)      | 980                                            |      |
| Lucilia (323)         |                        | <i>Lucilia cuprina</i> (Wiedemann, 1830)             | 70                                             |      |
|                       |                        | <i>Lucilia sericata</i> (Meigen, 1826)               | 3                                              |      |
|                       |                        | <i>Lucilia bazini</i> Seguy, 1934                    | 22                                             |      |
|                       |                        | <i>Lucilia hainanensis</i> Fan, 1965                 | 23                                             |      |
|                       |                        | <i>Lucilia porphyrina</i> (Walker, 1856)             | 205                                            |      |
| Muscidae (779)        | Ophyra (194)           | <i>Hydrotaea chalcogaster</i> (Wiedemann, 1824)      | 157                                            |      |
|                       |                        | <i>Hydrotaea spinigera</i> Hennig, 1962              | 37                                             |      |
|                       | Musca (516)            | <i>Musca domestica</i> Linnaeus, 1758                | 416                                            |      |
|                       |                        | <i>Musca ventrosa</i> Wiedemann, 1830                | 18                                             |      |
|                       |                        | <i>Musca sorbens</i> Wiedemann, 1830                 | 82                                             |      |

|                   |                           |                                            |    |
|-------------------|---------------------------|--------------------------------------------|----|
|                   | <i>Synthesiomyia</i> (65) | <i>Synthesiomyia nudiseta</i> (Wulp, 1883) | 65 |
|                   | <i>Muscina</i> (4)        | <i>Muscina stabulans</i> (Fallen, 1817)    | 4  |
| Fanniidae (3)     | <i>Fannia</i> (3)         | <i>Fannia pusio</i> (Wiedemann, 1830)      | 3  |
| Anthomyiidae (52) | <i>Anthomyia</i> (52)     | <i>Anthomyia illocata</i> Walker, 1856     | 52 |

Note: The number in bracket indicates the size of samples collected.

**Table S2** Interspecific genetic divergence among 30 species based on analyses of COI

|                          |       |       |       |       |       |       |       |       |       |       |       |       |       |       |       |       |       |       |       |       |       |       |       |  |  |  |  |  |  |  |
|--------------------------|-------|-------|-------|-------|-------|-------|-------|-------|-------|-------|-------|-------|-------|-------|-------|-------|-------|-------|-------|-------|-------|-------|-------|--|--|--|--|--|--|--|
| <i>S. princeps</i>       |       |       |       |       |       |       |       |       |       |       |       |       |       |       |       |       |       |       |       |       |       |       |       |  |  |  |  |  |  |  |
| <i>S. brevicornis</i>    | 0.075 |       |       |       |       |       |       |       |       |       |       |       |       |       |       |       |       |       |       |       |       |       |       |  |  |  |  |  |  |  |
| <i>S. misera</i>         | 0.091 | 0.058 |       |       |       |       |       |       |       |       |       |       |       |       |       |       |       |       |       |       |       |       |       |  |  |  |  |  |  |  |
| <i>S. caudagalli</i>     | 0.095 | 0.077 | 0.085 |       |       |       |       |       |       |       |       |       |       |       |       |       |       |       |       |       |       |       |       |  |  |  |  |  |  |  |
| <i>S. pattoni</i>        | 0.090 | 0.082 | 0.102 | 0.089 |       |       |       |       |       |       |       |       |       |       |       |       |       |       |       |       |       |       |       |  |  |  |  |  |  |  |
| <i>S. ruficornis</i>     | 0.074 | 0.072 | 0.077 | 0.089 | 0.088 |       |       |       |       |       |       |       |       |       |       |       |       |       |       |       |       |       |       |  |  |  |  |  |  |  |
| <i>S. josephi</i>        | 0.089 | 0.089 | 0.095 | 0.102 | 0.103 | 0.095 |       |       |       |       |       |       |       |       |       |       |       |       |       |       |       |       |       |  |  |  |  |  |  |  |
| <i>S. peregrina</i>      | 0.094 | 0.070 | 0.073 | 0.083 | 0.089 | 0.081 | 0.104 |       |       |       |       |       |       |       |       |       |       |       |       |       |       |       |       |  |  |  |  |  |  |  |
| <i>S. dux</i>            | 0.088 | 0.052 | 0.067 | 0.082 | 0.096 | 0.081 | 0.095 | 0.077 |       |       |       |       |       |       |       |       |       |       |       |       |       |       |       |  |  |  |  |  |  |  |
| <i>S. albiceps</i>       | 0.085 | 0.061 | 0.048 | 0.086 | 0.100 | 0.077 | 0.096 | 0.073 | 0.071 |       |       |       |       |       |       |       |       |       |       |       |       |       |       |  |  |  |  |  |  |  |
| <i>S. scopariiformis</i> | 0.099 | 0.076 | 0.084 | 0.085 | 0.094 | 0.091 | 0.092 | 0.076 | 0.088 | 0.079 |       |       |       |       |       |       |       |       |       |       |       |       |       |  |  |  |  |  |  |  |
| <i>S. formosensis</i>    | 0.095 | 0.073 | 0.068 | 0.092 | 0.092 | 0.083 | 0.102 | 0.028 | 0.081 | 0.072 | 0.075 |       |       |       |       |       |       |       |       |       |       |       |       |  |  |  |  |  |  |  |
| <i>S. cinerea</i>        | 0.099 | 0.092 | 0.106 | 0.111 | 0.113 | 0.096 | 0.112 | 0.103 | 0.101 | 0.102 | 0.107 | 0.107 |       |       |       |       |       |       |       |       |       |       |       |  |  |  |  |  |  |  |
| <i>C. villeneuvi</i>     | 0.109 | 0.096 | 0.106 | 0.115 | 0.119 | 0.105 | 0.115 | 0.111 | 0.105 | 0.102 | 0.107 | 0.113 | 0.125 |       |       |       |       |       |       |       |       |       |       |  |  |  |  |  |  |  |
| <i>C. megacephala</i>    | 0.108 | 0.105 | 0.113 | 0.125 | 0.125 | 0.105 | 0.122 | 0.122 | 0.109 | 0.109 | 0.118 | 0.122 | 0.132 | 0.064 |       |       |       |       |       |       |       |       |       |  |  |  |  |  |  |  |
| <i>C. pinguis</i>        | 0.112 | 0.108 | 0.120 | 0.128 | 0.125 | 0.107 | 0.130 | 0.125 | 0.114 | 0.110 | 0.125 | 0.123 | 0.136 | 0.071 | 0.025 |       |       |       |       |       |       |       |       |  |  |  |  |  |  |  |
| <i>C. rufifacies</i>     | 0.107 | 0.103 | 0.103 | 0.123 | 0.115 | 0.108 | 0.112 | 0.119 | 0.105 | 0.103 | 0.102 | 0.116 | 0.119 | 0.045 | 0.066 | 0.073 |       |       |       |       |       |       |       |  |  |  |  |  |  |  |
| <i>L. hainanensis</i>    | 0.116 | 0.105 | 0.108 | 0.123 | 0.119 | 0.099 | 0.121 | 0.112 | 0.115 | 0.105 | 0.117 | 0.109 | 0.127 | 0.094 | 0.097 | 0.096 | 0.099 |       |       |       |       |       |       |  |  |  |  |  |  |  |
| <i>L. cuprina</i>        | 0.105 | 0.102 | 0.103 | 0.109 | 0.118 | 0.100 | 0.119 | 0.111 | 0.105 | 0.097 | 0.109 | 0.113 | 0.119 | 0.095 | 0.081 | 0.089 | 0.098 | 0.061 |       |       |       |       |       |  |  |  |  |  |  |  |
| <i>L. porphyrina</i>     | 0.115 | 0.106 | 0.111 | 0.126 | 0.119 | 0.097 | 0.122 | 0.113 | 0.115 | 0.109 | 0.119 | 0.111 | 0.127 | 0.095 | 0.097 | 0.098 | 0.098 | 0.008 | 0.059 |       |       |       |       |  |  |  |  |  |  |  |
| <i>L. bazini</i>         | 0.111 | 0.100 | 0.105 | 0.118 | 0.114 | 0.103 | 0.111 | 0.105 | 0.102 | 0.099 | 0.115 | 0.112 | 0.116 | 0.089 | 0.090 | 0.094 | 0.095 | 0.063 | 0.065 | 0.065 |       |       |       |  |  |  |  |  |  |  |
| <i>L. sericata</i>       | 0.107 | 0.100 | 0.099 | 0.105 | 0.118 | 0.100 | 0.117 | 0.110 | 0.102 | 0.095 | 0.108 | 0.112 | 0.122 | 0.096 | 0.084 | 0.087 | 0.099 | 0.055 | 0.010 | 0.062 | 0.065 |       |       |  |  |  |  |  |  |  |
| <i>H. ligurriens</i>     | 0.109 | 0.100 | 0.102 | 0.119 | 0.118 | 0.107 | 0.123 | 0.120 | 0.109 | 0.105 | 0.119 | 0.120 | 0.128 | 0.094 | 0.085 | 0.093 | 0.099 | 0.072 | 0.062 | 0.073 | 0.076 | 0.064 |       |  |  |  |  |  |  |  |
| <i>M. sorbens</i>        | 0.119 | 0.119 | 0.128 | 0.126 | 0.122 | 0.115 | 0.126 | 0.125 | 0.115 | 0.115 | 0.127 | 0.128 | 0.144 | 0.117 | 0.102 | 0.099 | 0.117 | 0.112 | 0.105 | 0.114 | 0.112 | 0.103 | 0.109 |  |  |  |  |  |  |  |

|                        |      |      |      |      |      |      |      |      |      |      |      |      |      |      |      |      |      |      |      |      |      |      |      |      |      |      |      |      |      |
|------------------------|------|------|------|------|------|------|------|------|------|------|------|------|------|------|------|------|------|------|------|------|------|------|------|------|------|------|------|------|------|
| <i>M. domestica</i>    | 0132 | 0125 | 0132 | 0128 | 0122 | 0124 | 0133 | 0130 | 0129 | 0120 | 0129 | 0132 | 0148 | 0105 | 0099 | 0097 | 0101 | 0112 | 0109 | 0113 | 0107 | 0109 | 0114 | 0069 |      |      |      |      |      |
| <i>H. chalcogaster</i> | 0109 | 0099 | 0110 | 0125 | 0120 | 0112 | 0121 | 0114 | 0114 | 0115 | 0117 | 0124 | 0128 | 0109 | 0109 | 0121 | 0111 | 0098 | 0092 | 0101 | 0095 | 0089 | 0097 | 0105 | 0111 |      |      |      |      |
| <i>H. spinigera</i>    | 0117 | 0109 | 0118 | 0123 | 0132 | 0117 | 0122 | 0125 | 0113 | 0122 | 0119 | 0127 | 0128 | 0102 | 0105 | 0115 | 0102 | 0111 | 0097 | 0112 | 0100 | 0097 | 0102 | 0110 | 0105 | 0076 |      |      |      |
| <i>M. stabulans</i>    | 0130 | 0120 | 0125 | 0142 | 0141 | 0130 | 0143 | 0141 | 0128 | 0120 | 0134 | 0140 | 0148 | 0125 | 0121 | 0125 | 0124 | 0120 | 0109 | 0119 | 0118 | 0108 | 0115 | 0123 | 0119 | 0115 | 0120 |      |      |
| <i>S. nudiseta</i>     | 0114 | 0116 | 0121 | 0135 | 0139 | 0119 | 0138 | 0139 | 0129 | 0124 | 0128 | 0142 | 0138 | 0120 | 0119 | 0129 | 0112 | 0120 | 0112 | 0122 | 0115 | 0109 | 0109 | 0121 | 0122 | 0097 | 0100 | 0125 |      |
| <i>A. illocata</i>     | 0116 | 0101 | 0116 | 0128 | 0129 | 0110 | 0122 | 0127 | 0118 | 0113 | 0115 | 0129 | 0130 | 0100 | 0106 | 0106 | 0103 | 0103 | 0099 | 0103 | 0112 | 0096 | 0105 | 0116 | 0109 | 0104 | 0113 | 0113 | 0119 |
